# Supplementary material
Source: MDPI journal article supplement (https://www.mdpi.com/2071-1050/14/9/4883)
Supplement: s1 [file s1]

## Supplementary Materials

**Table S1.** The characteristics band assignment of various soil constituents in mid infrared region.

| Soil constituents                  | MIR wave number (cm <sup>-1</sup> ) |
|------------------------------------|-------------------------------------|
| Water                              | 3278, 1645, 3484                    |
| Hydroxyl                           | 3575                                |
| Kaolin                             | 3695, 3620, 915                     |
| Smectite                           | 3620, 915, 885                      |
| Illite                             | 3620                                |
| Carbonate                          | 1415                                |
| Aromatics                          | 3030                                |
| Amine                              | 1610, 3330                          |
| Alkyl asymmetric–symmetric doublet | 2930, 2850                          |
| Carboxylic acids                   | 1725                                |
| Amides                             | 1640                                |
| Aliphatics                         | 1465                                |
| Methyls                            | 1445–1350                           |
| Phenolics                          | 1275                                |
| Polysaccharides                    | 1170                                |

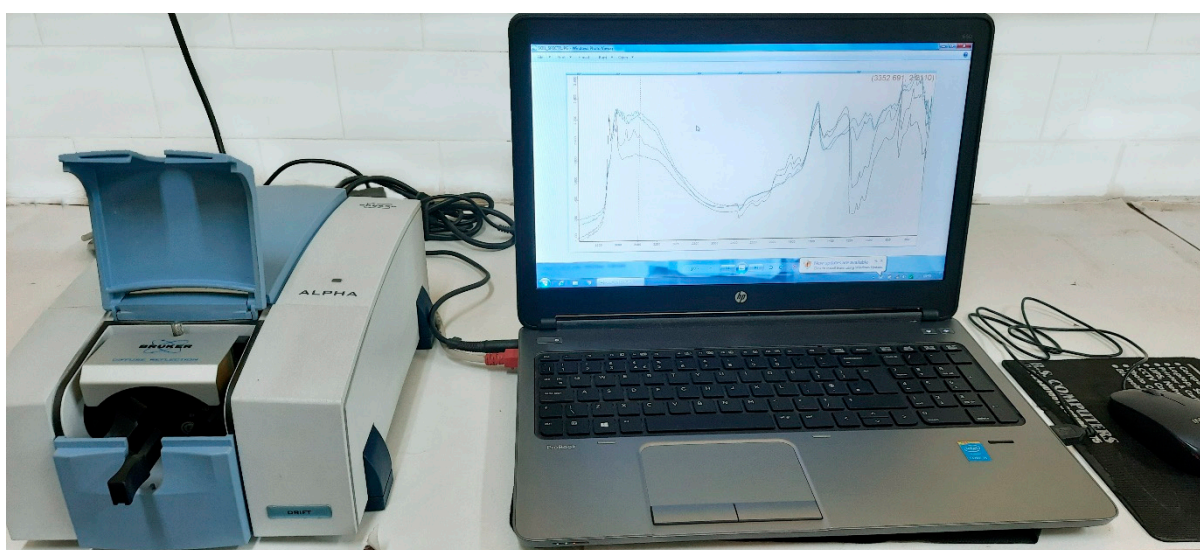

**Figure S1.** A representative picture of MIR instrument with Drift spectra.
